# Supplementary material for: Conditions for the success and the feasibility of health mediation for healthcare use by underserved populations: a scoping review
Source: PubMed Central journal article supplement — BMJ Open. 2022 Sep 20;12(9):e062051. doi: 10.1136/bmjopen-2022-062051 (PMC9490640; doi:10.1136/bmjopen-2022-062051), 2022-09-20
Supplement: bmjopen-2022-062051supp002.pdf [file bmjopen-2022-062051supp002.pdf]

## Appendix 2: Search algorithm

| Pubmed                                                                                                                                                                                                                                                                                                                                                                                                                                                                                                                                                                                                                                                                                                                                                                                                                                                                                                                                                                                                                                                                                                                                                                                                                                                                                                                                                                                                                                                                                                                                                                                                                                                                                                                 | Number of articles | Date extracted |
|------------------------------------------------------------------------------------------------------------------------------------------------------------------------------------------------------------------------------------------------------------------------------------------------------------------------------------------------------------------------------------------------------------------------------------------------------------------------------------------------------------------------------------------------------------------------------------------------------------------------------------------------------------------------------------------------------------------------------------------------------------------------------------------------------------------------------------------------------------------------------------------------------------------------------------------------------------------------------------------------------------------------------------------------------------------------------------------------------------------------------------------------------------------------------------------------------------------------------------------------------------------------------------------------------------------------------------------------------------------------------------------------------------------------------------------------------------------------------------------------------------------------------------------------------------------------------------------------------------------------------------------------------------------------------------------------------------------------|--------------------|----------------|
| ((("Health mediation"[TI] OR "Health mediator*"[TI] OR (communit*[TI] AND ("health worker*"[TI] OR "intervention*"[TI] OR program*[TI] )) OR "Peer mentor*"[TI] OR "Peer mentorship"[TI] OR "Peer mentoring"[TI] OR "peer-led"[TI] OR "Community Participation"[Mesh] OR "Community Health Workers"[Mesh]) AND (effectiveness[TIAB] OR efficacy[TIAB] OR effective[TIAB] OR success[TIAB] OR successful [TIAB] OR evaluation*[TIAB] OR Assessment*[TIAB] OR impact*[TIAB] OR outcome*[TIAB] OR effect*[TIAB] OR performance*[TIAB] OR attainment*[TIAB] OR consequence*[TIAB] OR influence*[TIAB] OR evaluating[TIAB] OR assessment[TIAB] OR Barrier* [TI] OR Facilitator* [TI] OR Implementation [TI] OR Factor* [TI] OR lesson*[TI] OR "Evaluation Studies as Topic"[Mesh] OR "Program Evaluation"[Mesh] OR "Evaluation Study" [Publication Type] OR "Comparative Effectiveness Research"[Mesh]) AND ("hard to reach"[TIAB] OR immigrant*[TIAB] OR immigration*[TIAB] OR Emigrant*[TIAB] OR Migrant*[TIAB] OR refugee*[TIAB] OR traveller*[TIAB] OR Traveler*[TIAB] OR Traveling[TIAB] OR gypsy[TIAB] OR Roma[TIAB] OR romani[TIAB] OR Gypsies[TIAB] OR Gipsies[TIAB] OR Romany[TIAB] OR Romanies[TIAB] OR homelessness[TIAB] OR homeless[TIAB] OR houseless[TIAB] OR Vulnerable[TIAB] OR marginalised[TIAB] OR Marginalization[TIAB] OR "Minority group*"[TIAB] OR "Minority Health"[TIAB] OR "Social exclusion*"[TIAB] OR "Transients and Migrants"[Mesh] OR "Emigrants and Immigrants"[Mesh] OR "Minority Groups"[Mesh] OR "Minority Health"[Mesh] OR "Homeless Persons"[Mesh] OR "Vulnerable Populations"[Mesh] OR "Poverty"[MAJR] OR "Roma"[Mesh]) AND 2015/01/01[crdt]:2020/12/01[crdt]) AND (2015:2020[pdat]) | 822                | 15/12/2020     |
| <b>Scopus</b>                                                                                                                                                                                                                                                                                                                                                                                                                                                                                                                                                                                                                                                                                                                                                                                                                                                                                                                                                                                                                                                                                                                                                                                                                                                                                                                                                                                                                                                                                                                                                                                                                                                                                                          |                    |                |
| TITLE ( "Health mediation*" OR "Peer mentor" OR "Peer mentors" OR "Peer mentorship" OR "Peer mentoring" OR "peer-led" OR ( health W/5 mediation* OR mediator* ) OR ( community* W/5 "health worker*" OR intervention* OR program* ) ) AND TITLE-ABS-KEY ( effectiveness OR efficacy OR effective OR success OR evaluati* OR assessment* OR impact* OR outcome* OR effect* OR performance* OR attainment* OR consequence* OR influence* OR successful ) OR TITLE ( barrier* OR facilitator* OR implementation OR factor* OR lesson* ) AND TITLE-ABS-KEY ( "hard to reach" OR immigrant* OR immigration* OR emigrant* OR migrant* OR refugee* OR traveller* OR traveler* OR traveling OR gypsy OR roma OR romani OR gypsies OR gipsies OR romany OR romanies OR homelessness OR homeless OR houseless OR vulnerable OR marginalised OR marginalization OR "Minority group" OR "Minority groups" OR "Minority Health" OR "Social exclusion" OR "Social exclusions" ) AND ( LIMIT-TO ( PUBYEAR,2020) OR LIMIT-TO ( PUBYEAR,2019) OR LIMIT-TO ( PUBYEAR,2018) OR LIMIT-TO ( PUBYEAR,2017) OR LIMIT-TO ( PUBYEAR,2016) OR LIMIT-TO ( PUBYEAR,2015) ) AND ( LIMIT-TO ( LANGUAGE,"English" ) OR LIMIT-TO ( LANGUAGE,"French" ) )                                                                                                                                                                                                                                                                                                                                                                                                                                                                                               | 407                | 15/12/2020     |
| <b>Psychinfo</b>                                                                                                                                                                                                                                                                                                                                                                                                                                                                                                                                                                                                                                                                                                                                                                                                                                                                                                                                                                                                                                                                                                                                                                                                                                                                                                                                                                                                                                                                                                                                                                                                                                                                                                       |                    |                |
| TI ( "Health mediation*" OR "Peer mentor*" OR "Peer mentorship" OR "Peer mentoring" OR "peer-led" OR "health mediation*" OR "health mediator*" OR                                                                                                                                                                                                                                                                                                                                                                                                                                                                                                                                                                                                                                                                                                                                                                                                                                                                                                                                                                                                                                                                                                                                                                                                                                                                                                                                                                                                                                                                                                                                                                      | 150                | 15/12/2020     |

|                                                                                                                                                                                                                                                                                                                                                                                                                                                                                                                                                                                                                                                                                                                                                                                                   |  |  |
|---------------------------------------------------------------------------------------------------------------------------------------------------------------------------------------------------------------------------------------------------------------------------------------------------------------------------------------------------------------------------------------------------------------------------------------------------------------------------------------------------------------------------------------------------------------------------------------------------------------------------------------------------------------------------------------------------------------------------------------------------------------------------------------------------|--|--|
| "community health worker*" OR "community-based worker*" OR "community-based intervention*" OR "community-based program* ) AND AB ( effectiveness OR efficacy OR effective OR success OR evaluati* OR assessment* OR impact* OR outcome* OR effect* OR performance* OR attainment* OR consequence* OR influence* OR successful OR barrier* OR facilitator* OR implementation OR factor* OR lesson* ) AND AB ( "hard to reach" OR immigrant* OR immigration* OR emigrant* OR migrant* OR refugee* OR traveller* OR traveler* OR traveling OR gypsy OR roma OR romani OR gypsies OR gipsies OR romany OR romanies OR homelessness OR homeless OR houseless OR vulnerable OR marginalised OR marginalization OR "Minority group*" OR "Minority Health" OR "Social exclusion" OR "Social exclusions" ) |  |  |
|---------------------------------------------------------------------------------------------------------------------------------------------------------------------------------------------------------------------------------------------------------------------------------------------------------------------------------------------------------------------------------------------------------------------------------------------------------------------------------------------------------------------------------------------------------------------------------------------------------------------------------------------------------------------------------------------------------------------------------------------------------------------------------------------------|--|--|
